# Supplementary material for: BioMapAI: Artificial Intelligence Multi-Omics Modeling of Myalgic Encephalomyelitis / Chronic Fatigue Syndrome
Source: PubMed Central journal article supplement — bioRxiv. 2025 Feb 13:2024.06.24.600378. Originally published 2024 Jun 28. Preprint. [Version 2] doi: 10.1101/2024.06.24.600378 (PMC11230215; doi:10.1101/2024.06.24.600378), 2025-02-13
Supplement: NIHPP2024.06.24.600378v1-supplement-7.pdf [file NIHPP2024.06.24.600378v1-supplement-7.pdf]

1075 **Supplemental Figure**

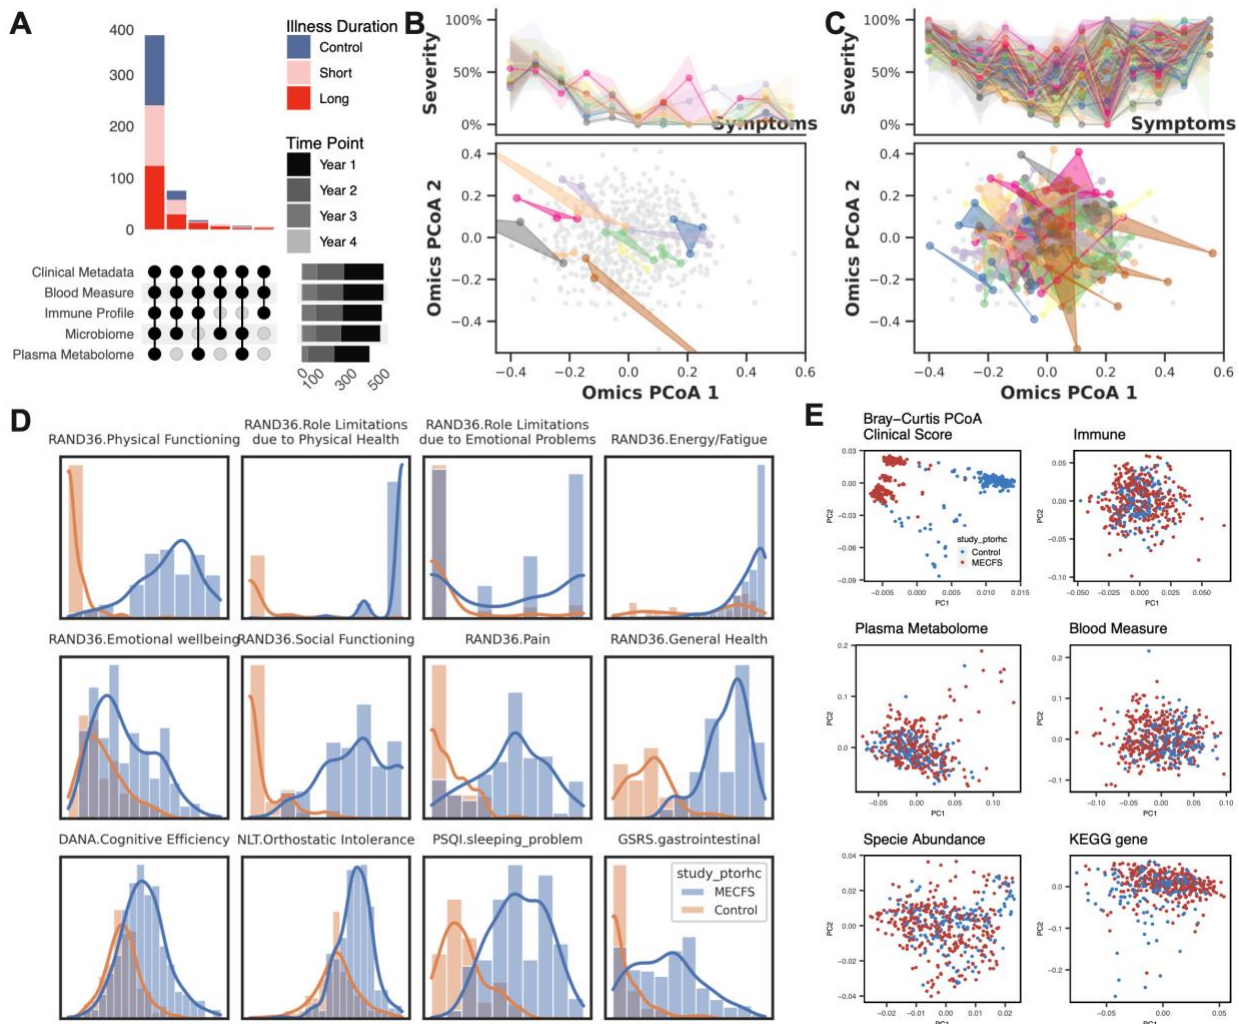

1076 **Supplemental Figure 1: Data Pairedness Overview and Heterogeneity in Healthy and Patients.**  
 1077 **A) Cohort Composition and Data Collection.** Over four years, 515 time points were collected:  
 1078 baseline year from all 249 donors (Healthy N=96, ME/CFS N=153); second year from 168  
 1079 individuals (Healthy N=58, ME/CFS N=110); third year from 94 individuals (Healthy N=13,  
 1080 ME/CFS N=81); fourth year from N=4 ME/CFS patients. Nearly 400 collection points included  
 1081 complete sets of 5 'omics datasets, with others capturing 3-4 'omics profiles. Clinical metadata  
 1082 and blood measures were collected at all 515 points. Immune profiles from PBMCs were  
 1083 recorded at 489 points, microbiome data from stool samples at 479 points, and plasma  
 1084 metabolome data at 414 points. A total of 1,471 biosamples were collected. **B-C) Heterogeneity**  
 1085 **of B) Healthy Controls and C) All Patients in Symptom Severity and 'Omics Profiles.**  
 1086 Supplemental information for Figure 1B, which shows examples from 20 patients. Variability in  
 1087 symptom severity (top) and 'omics profiles (bottom) for all healthy controls and all patients with  
 1088 3-4 time points. **D) Distribution of 12 Clinical Symptoms in ME/CFS and Control.** Density plots  
 1089 compare the distributions of 12 clinical scores between control (blue) and ME/CFS patients  
 1090 (orange) with the y-axis representing severity (scaled from 0% to 100%). Clinical scores include  
 1091 RAND36 subscales (e.g., Physical Functioning, Emotional Wellbeing), Cognitive Efficiency from  
 1092

1093 the DANA test, Orthostatic Intolerance from the NLT test, Sleep Problems from the PSQI  
1094 questionnaire, and Gastrointestinal Symptoms from the GSRS questionnaire. **E) Principal**  
1095 **Coordinates Analysis (PCoA) of each 'Omics.** PCoA based on Bray-Curtis distance for clinical  
1096 scores, immune profiles, plasma metabolome, blood measures, species abundance, and KEGG  
1097 gene data. Control samples (blue) and ME/CFS patients (red) show distinct clustering. Here,  
1098 except for the clinical scores, controls are indistinguishable from patients, highlighting the  
1099 difficulty of building classification models. **Abbreviations:** ME/CFS, Myalgic  
1100 Encephalomyelitis/Chronic Fatigue Syndrome; PCoA, Principal Coordinates Analysis; RAND36,  
1101 36-Item Short Form Health Survey; DANA, DANA Brain Vital; NLT, NASA Lean Test; PSQI,  
1102 Pittsburgh Sleep Quality Index; GSRS, Gastrointestinal Symptom Rating Scale; KEGG, Kyoto  
1103 Encyclopedia of Genes and Genomes. **Related to:** Figure 1-2.

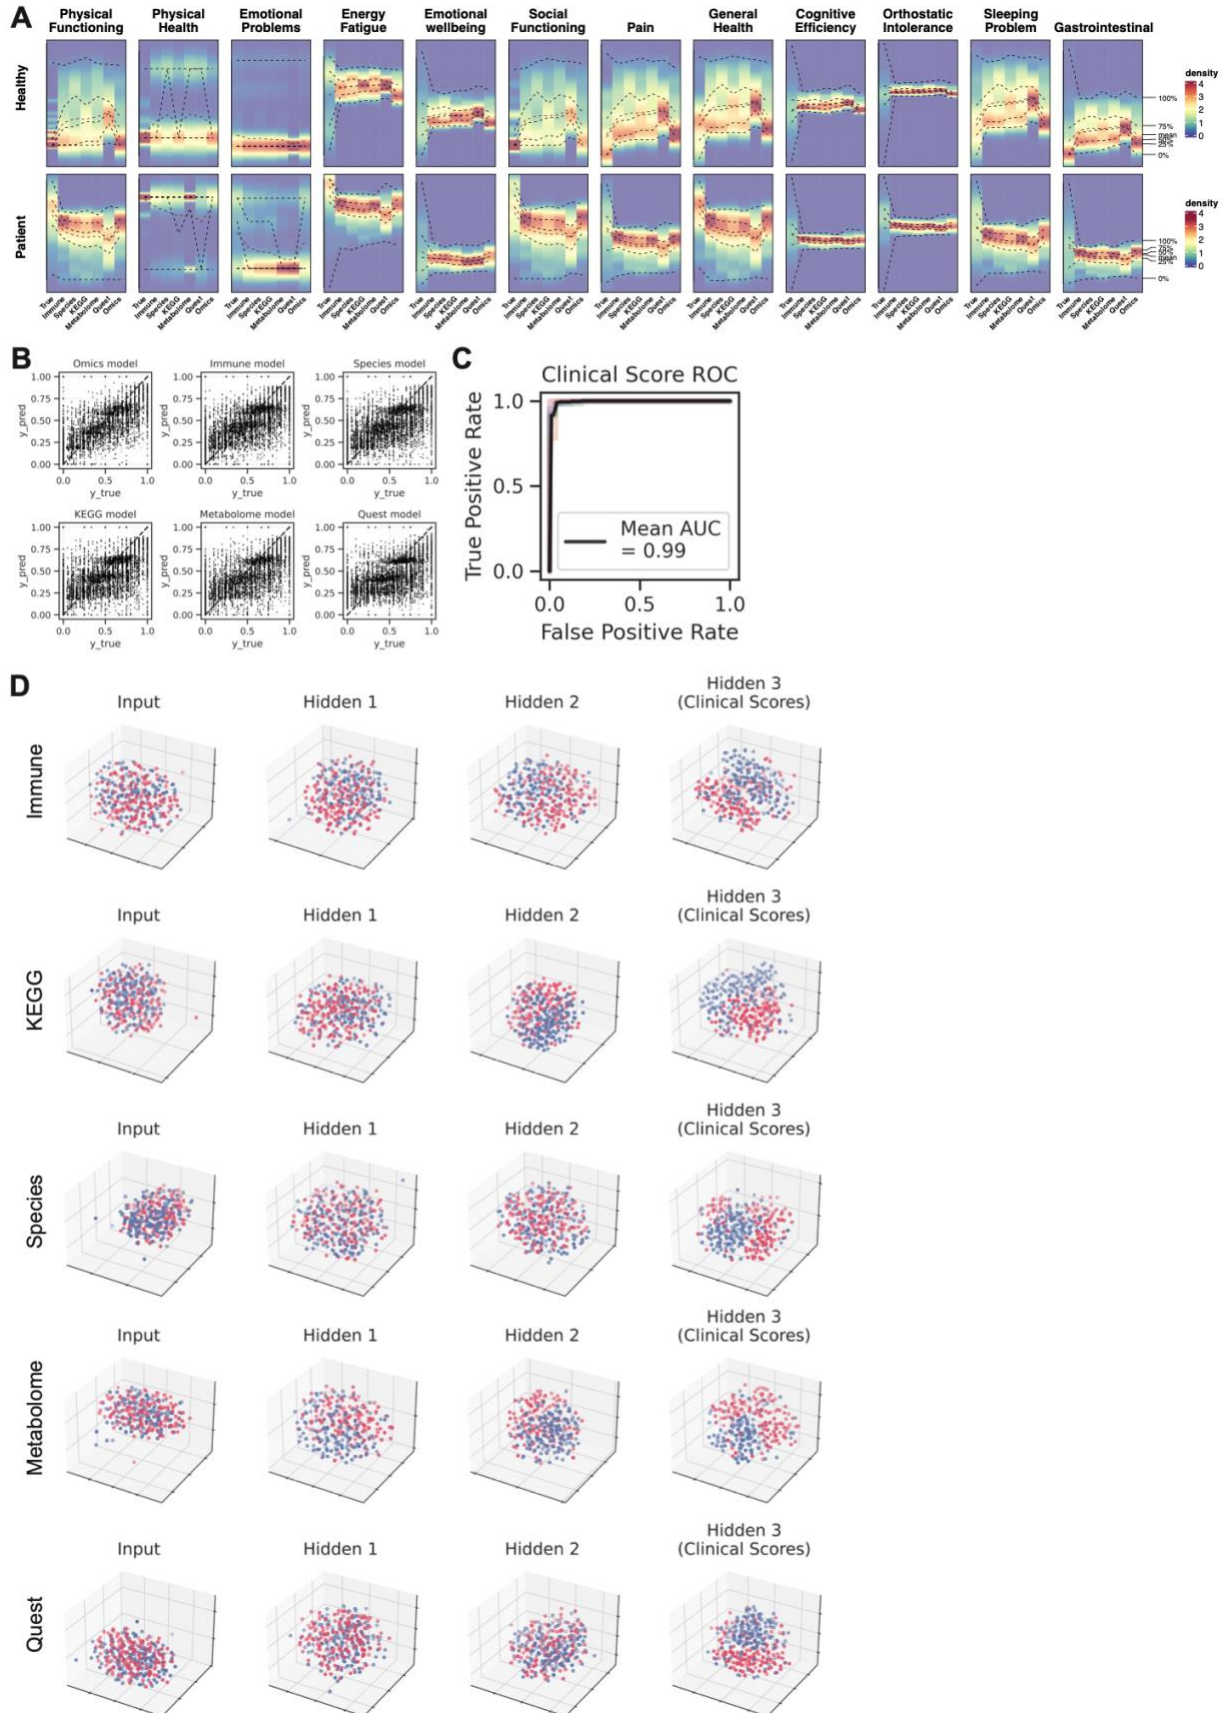

1105 **Supplemental Figure 2: BioMapAI's Performance at Clinical Score Reconstruction and Disease**  
1106 **Classification. A) Density map of True vs. Predicted Clinical Scores.** Supplemental information  
1107 for Figure 2B, which shows three examples. Here, the full set of 12 clinical scores compares the  
1108 true score,  $y$  (Column 1), against BioMapAI's predictions generated from different 'omics  
1109 profiles –  $\hat{y}_{immune}$ ,  $\hat{y}_{species}$ ,  $\hat{y}_{KEGG}$ ,  $\hat{y}_{metabolome}$ ,  $\hat{y}_{quest}$ ,  $\hat{y}_{omics}$  (Columns 2-7). **B) Scatter Plot of**  
1110 **True vs. Predicted Clinical Scores.** Scatter plots display the relationship between true clinical  
1111 scores (x-axis) and predicted clinical scores (y-axis) for six different models: Omics, Immune,  
1112 Species, KEGG, Metabolome, and Quest Labs. Each plot demonstrates the clinical score  
1113 prediction accuracy for each model. **C) ROC Curve for Disease Classification with Original**  
1114 **Clinical Scores.** The Receiver Operating Characteristic (ROC) curve evaluates the performance of  
1115 disease classification using the original 12 clinical scores. The mean Area Under the Curve (AUC)  
1116 is 0.99, indicating high prediction accuracy, which aligns with the clinical diagnosis of ME/CFS  
1117 based on key symptoms. **D) 3D t-SNE Visualization of Hidden Layers.** 3D t-SNE plots show how  
1118 BioMapAI progressively distinguishes disease from control across hidden layers for five trained  
1119 'omics models: Immune, KEGG, Species, Metabolome, and Quest Labs. Each plot uses the first  
1120 three principal components to show the spatial distribution of control samples (blue) and  
1121 ME/CFS patients (red). The progression from the input layer (mixed groups) to Hidden Layer 3  
1122 (fully separated groups) illustrates how BioMapAI progressively learns to separate ME/CFS from  
1123 healthy controls. **Abbreviations:** ROC, Receiver Operating Characteristic; AUC, Area Under the  
1124 Curve; t-SNE, t-Distributed Stochastic Neighbor Embedding; PCs, Principal Components;  $y$ , True  
1125 Score;  $\hat{y}$ , Predicted Score. **Related to:** Figure 2.

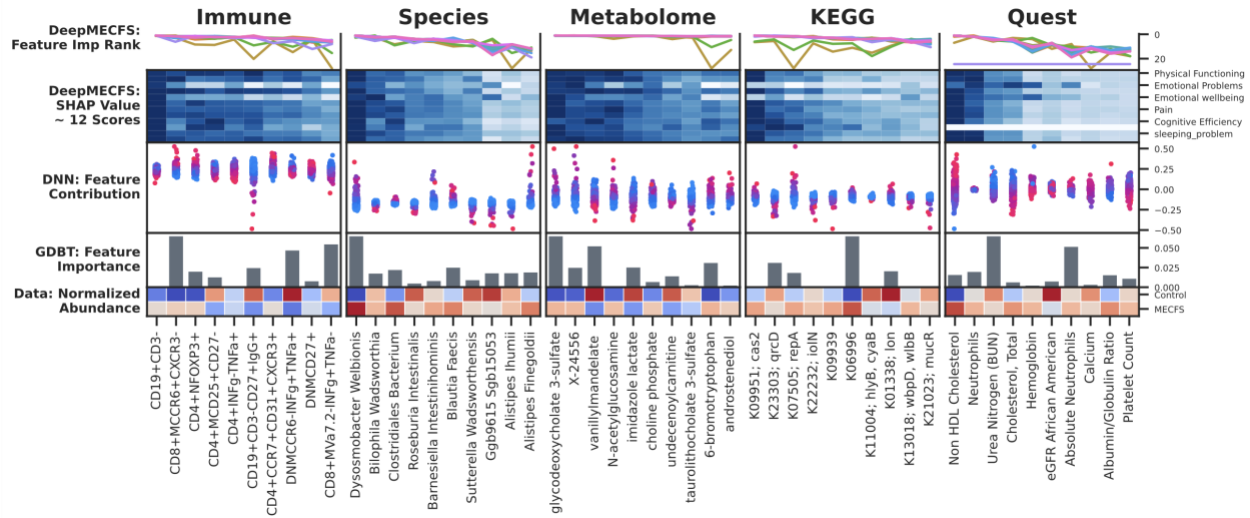

1126  
1127

**Supplemental Figure 3: Disease-Specific Biomarkers - Top 10 Biomarkers Shared across**

**Clinical Symptoms and Multiple Models.** Through the top 30 high-ranking features for each

score, we discovered that the most critical features for all 12 symptoms were largely shared

and consistently validated across ML and DL models, particularly the foremost 10. Here, this

multi-panel figure presents the top 10 most significant features identified by BioMapAI across

five 'omics profiles, highlighting their importance in predicting clinical symptoms and diagnostic

outcomes across BioMapAI, DNN, and GBDT models, along with their data prevalence. Each

vertical section represents one 'omics profile, with columns of biomarkers ordered by average

feature importance from right to left. From top to bottom: 1. *Feature Importance Ranking in*

*BioMapAI.* Lines depict the rank of feature importance for each clinical score, color-coded by

the 12 clinical scores. Consistency among the top 5 features suggests they are shared disease

biomarkers crucial for all clinical symptoms; 2. *Heatmap of SHAP Values from BioMapAI.* This

heatmap shows averaged SHAP values with the 12 scores on the rows and the top 10 features

in the columns. Darker colors indicate a stronger impact on the model's output; 3. *Swarm Plot*

*of SHAP Values from DNN.* This plot represents the distribution of feature contributions from

DNN, which is structurally similar to BioMapAI but omits the third hidden layer ( $Z^3$ ). SHAP

values are plotted vertically, ranging from negative to positive, showing each feature's influence

on prediction outcomes. Points represent individual samples, with color gradients denoting

actual feature values. For instance, *Dysosmobacteria welbionis*, identified as the most critical

species, shows that greater species relative abundance correlates with a higher likelihood of

disease prediction; 4. *Bar Graphs of Feature Importance in GBDT.* GBDT is another machine

learning model used for comparison. Each bar's height indicates a feature's significance within

the GBDT model, providing another perspective on the predictive relevance of each biomarker;

5. *Heatmap of Normalized Raw Abundance Data.* This heatmap compares biomarker prevalence

between healthy and disease states, with colors representing z-scored abundance values,

highlighting biomarker differences between groups. **Abbreviations:** DNN: Here refer to our

deep Learning model without the hidden 3, 'spread out' layer; GBDT: Gradient Boosting

Decision Tree; SHAP: SHapley Additive exPlanations. **Supporting Materials:** Supplemental Table

5. **Related to:** Figure 3.

1155

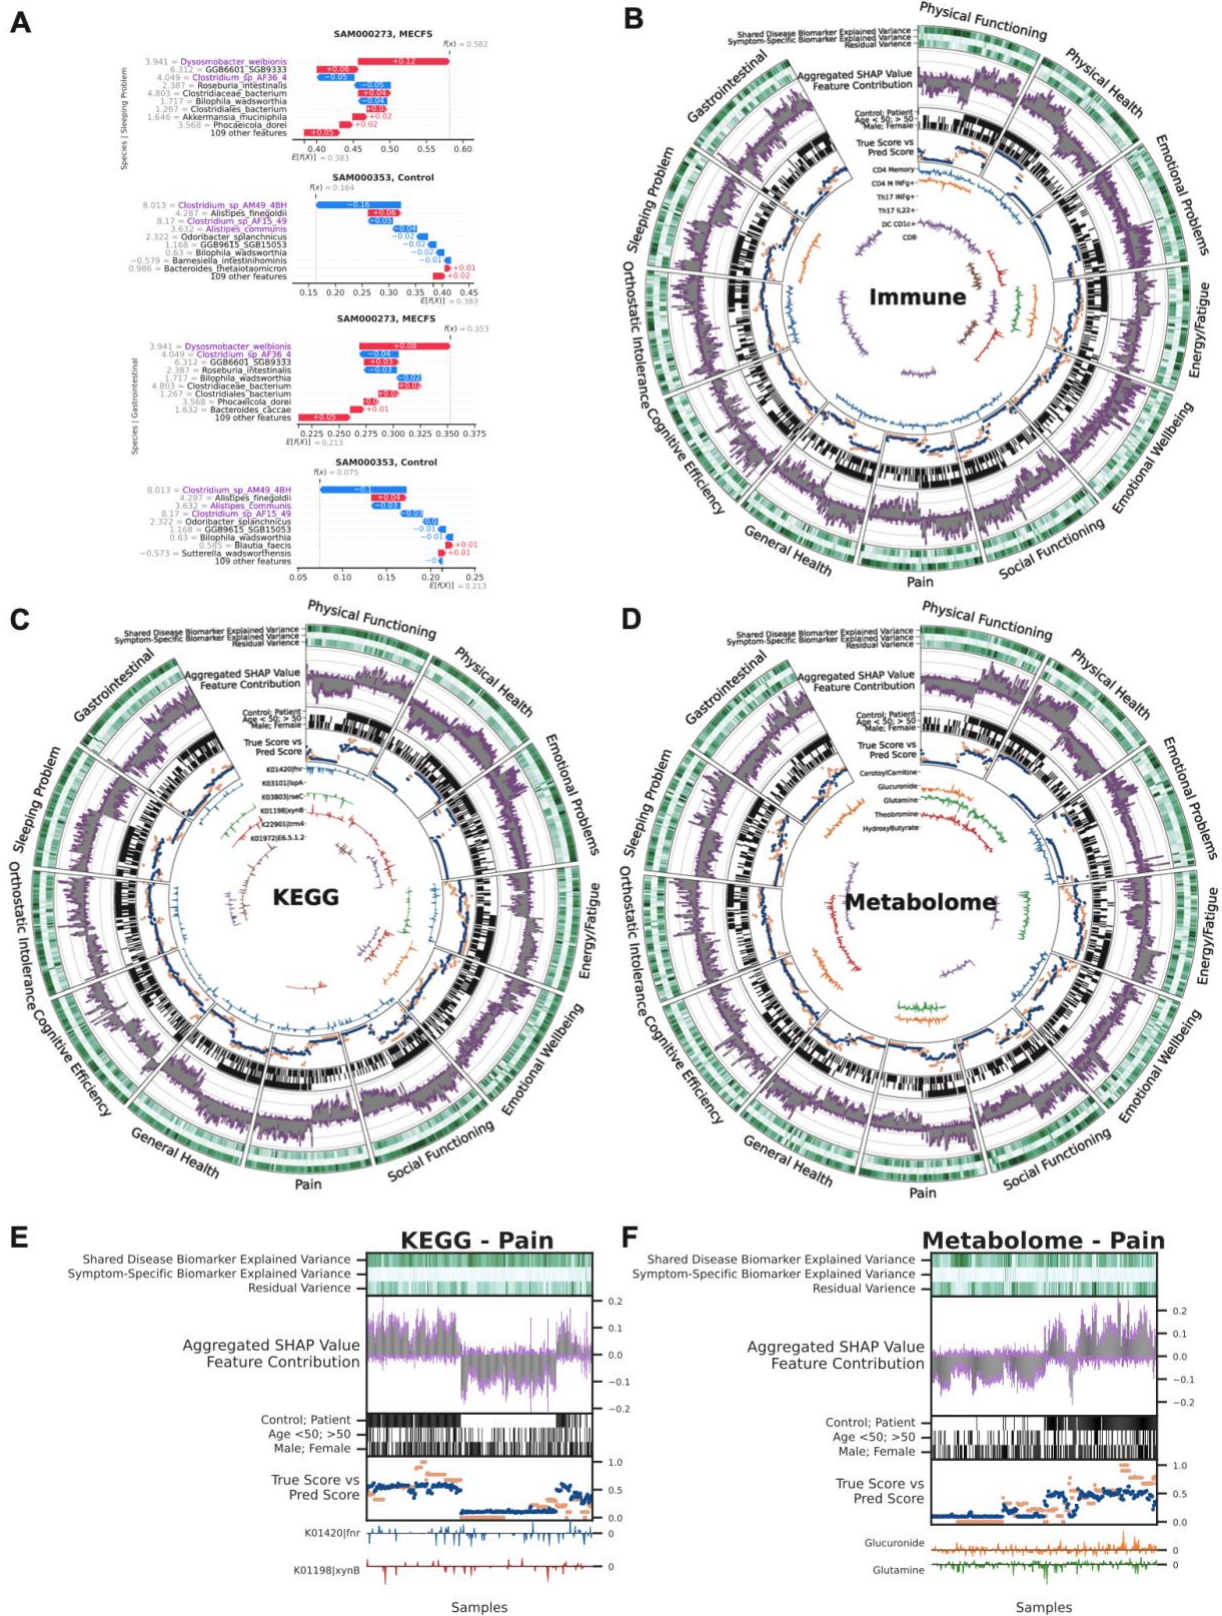

1156  
1157  
1158

**Supplemental Figure 4: Symptom-Specific Biomarkers - Immune, KEGG and Metabolome Models.** By linking 'omics profiles to clinical symptoms, BioMapAI identified unique symptom-

1159 specific biomarkers in addition to disease-specific biomarkers (Supplemental Figure 3). Each  
1160 'omics has a circularized diagram (Figure 3A, Supplemental Figure 4B-D) to display how  
1161 BioMapAI use this 'omics profile to predict 12 clinical symptoms and to discuss the contribution  
1162 of disease- and symptom-specific biomarkers. Detailed correlation between symptom-specific  
1163 biomarkers and their corresponding symptoms is in Supplemental Figure 5. **A) Examples of**  
1164 **Sleeping Problem-Specific Species' and Gastrointestinal-Specific Species' Contributions.**  
1165 Supplemental information for Figure 3D, which shows the contribution of pain-specific species.  
1166 **B-D) Circularized Diagram for Immune, KEGG and Metabolome Models.** Supplemental  
1167 information for Figure 3A, which shows the species model. **E-F) Zoomed Segment for Pain in**  
1168 **KEGG and Metabolome Model.** Supplemental information for Figure 3B, which shows the  
1169 zoomed segment for pain in the species and immune models. **Abbreviations and Supporting**  
1170 **Materials:** Supplemental Figure 5. **Related to:** Figure 3.

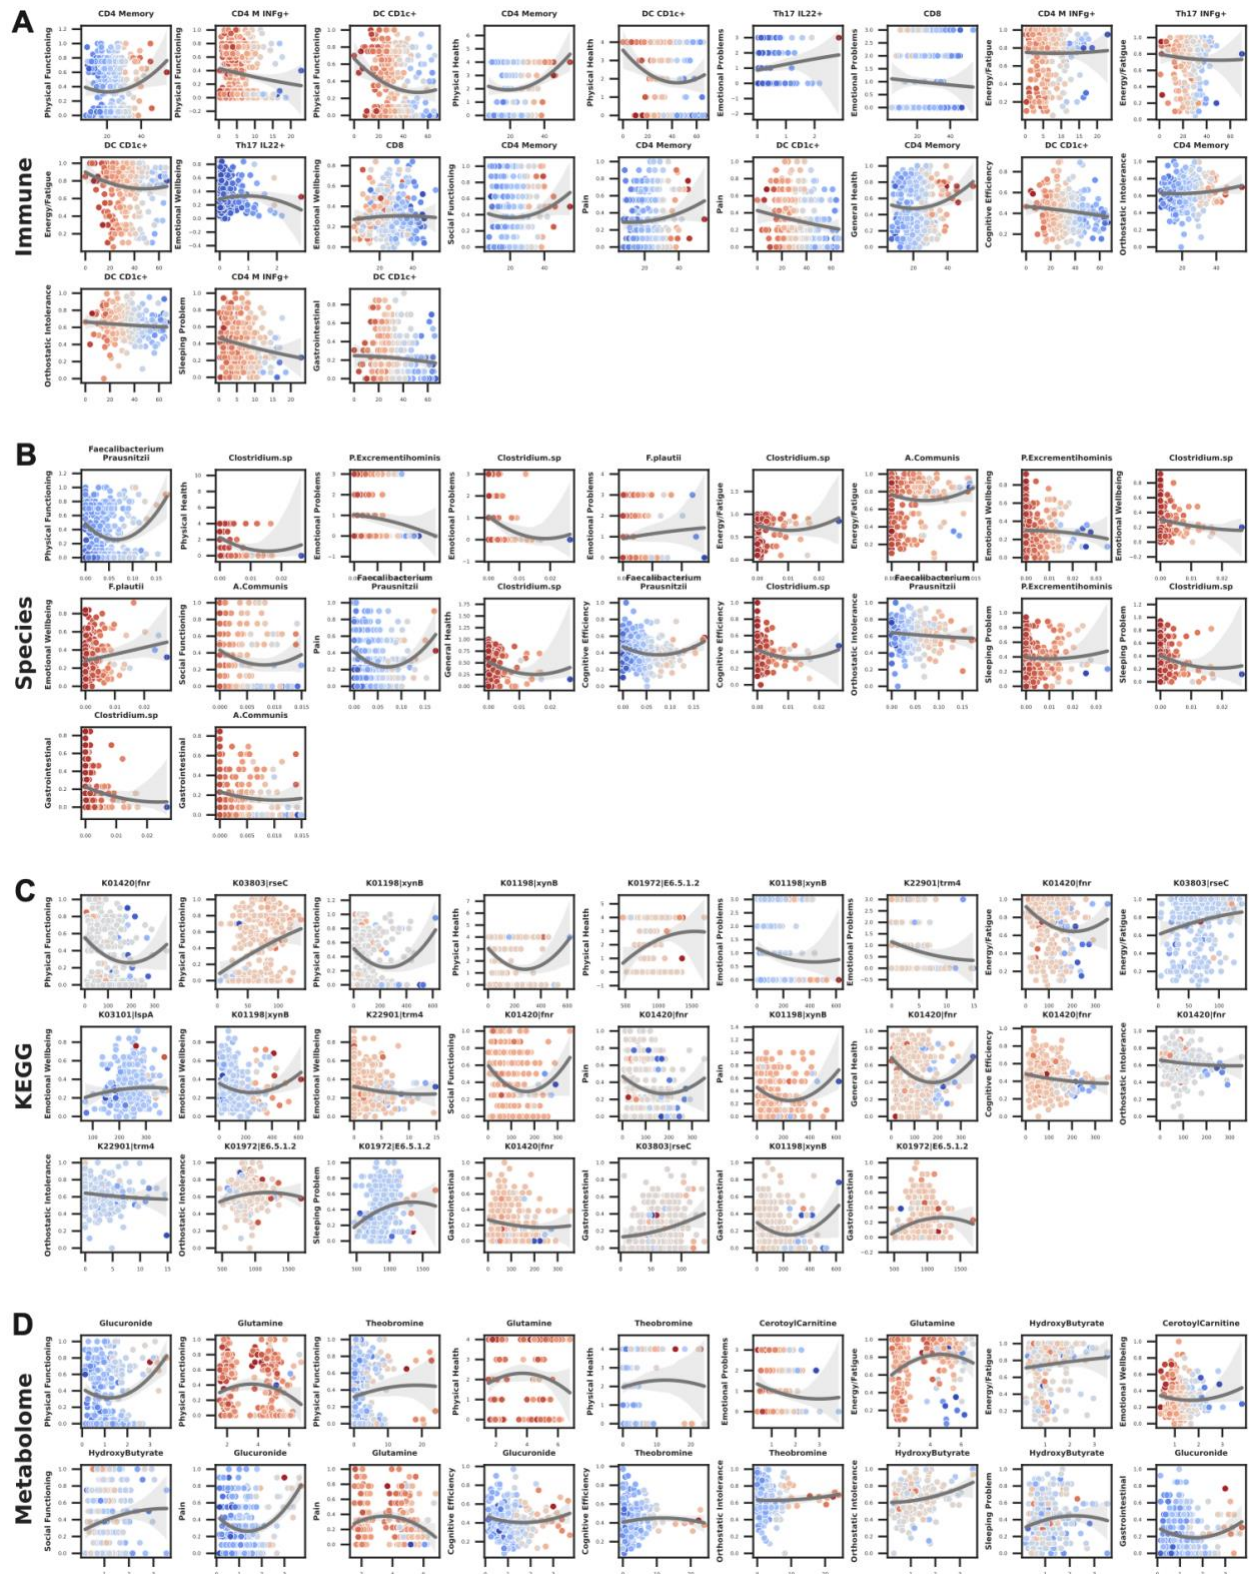

1171  
1172  
1173  
1174

**Supplemental Figure 5: Symptom-Specific Biomarkers - Different Correlation Patterns of Biomarkers to Symptom.** Supplemental information for Figure 3C, which shows six pain biomarkers from multiple models. Here for each 'omics, we plotted the correlation of symptom-



1175 specific biomarkers (x-axis) to its related symptom (y-axis), colored by SHAP value (contribution  
1176 to the symptom). **Abbreviations:** CD4, Cluster of Differentiation 4; CD8, Cluster of  
1177 Differentiation 8; IFNg, Interferon Gamma; DC, Dendritic Cells; MAIT, Mucosal-Associated  
1178 Invariant T; Th17, T helper 17 cells; CD4+ TCM, CD4+ Central Memory T cells; DC CD1c+ mBtp+,  
1179 Dendritic Cells expressing CD1c+ and myelin basic protein; DC CD1c+ mHsp, Dendritic Cells  
1180 expressing CD1c+ and heat shock protein; CD4+ TEM, CD4+ Effector Memory T cells; CD4+ Th17  
1181 rfx4+, CD4+ T helper 17 cells expressing RFX4; *F. prausnitzii*, *Faecalibacterium prausnitzii*; *A.*  
1182 *communis*, *Akkermansia communis*; NAD, Nicotinamide Adenine Dinucleotide. **Related to:**  
1183 Figure 3.

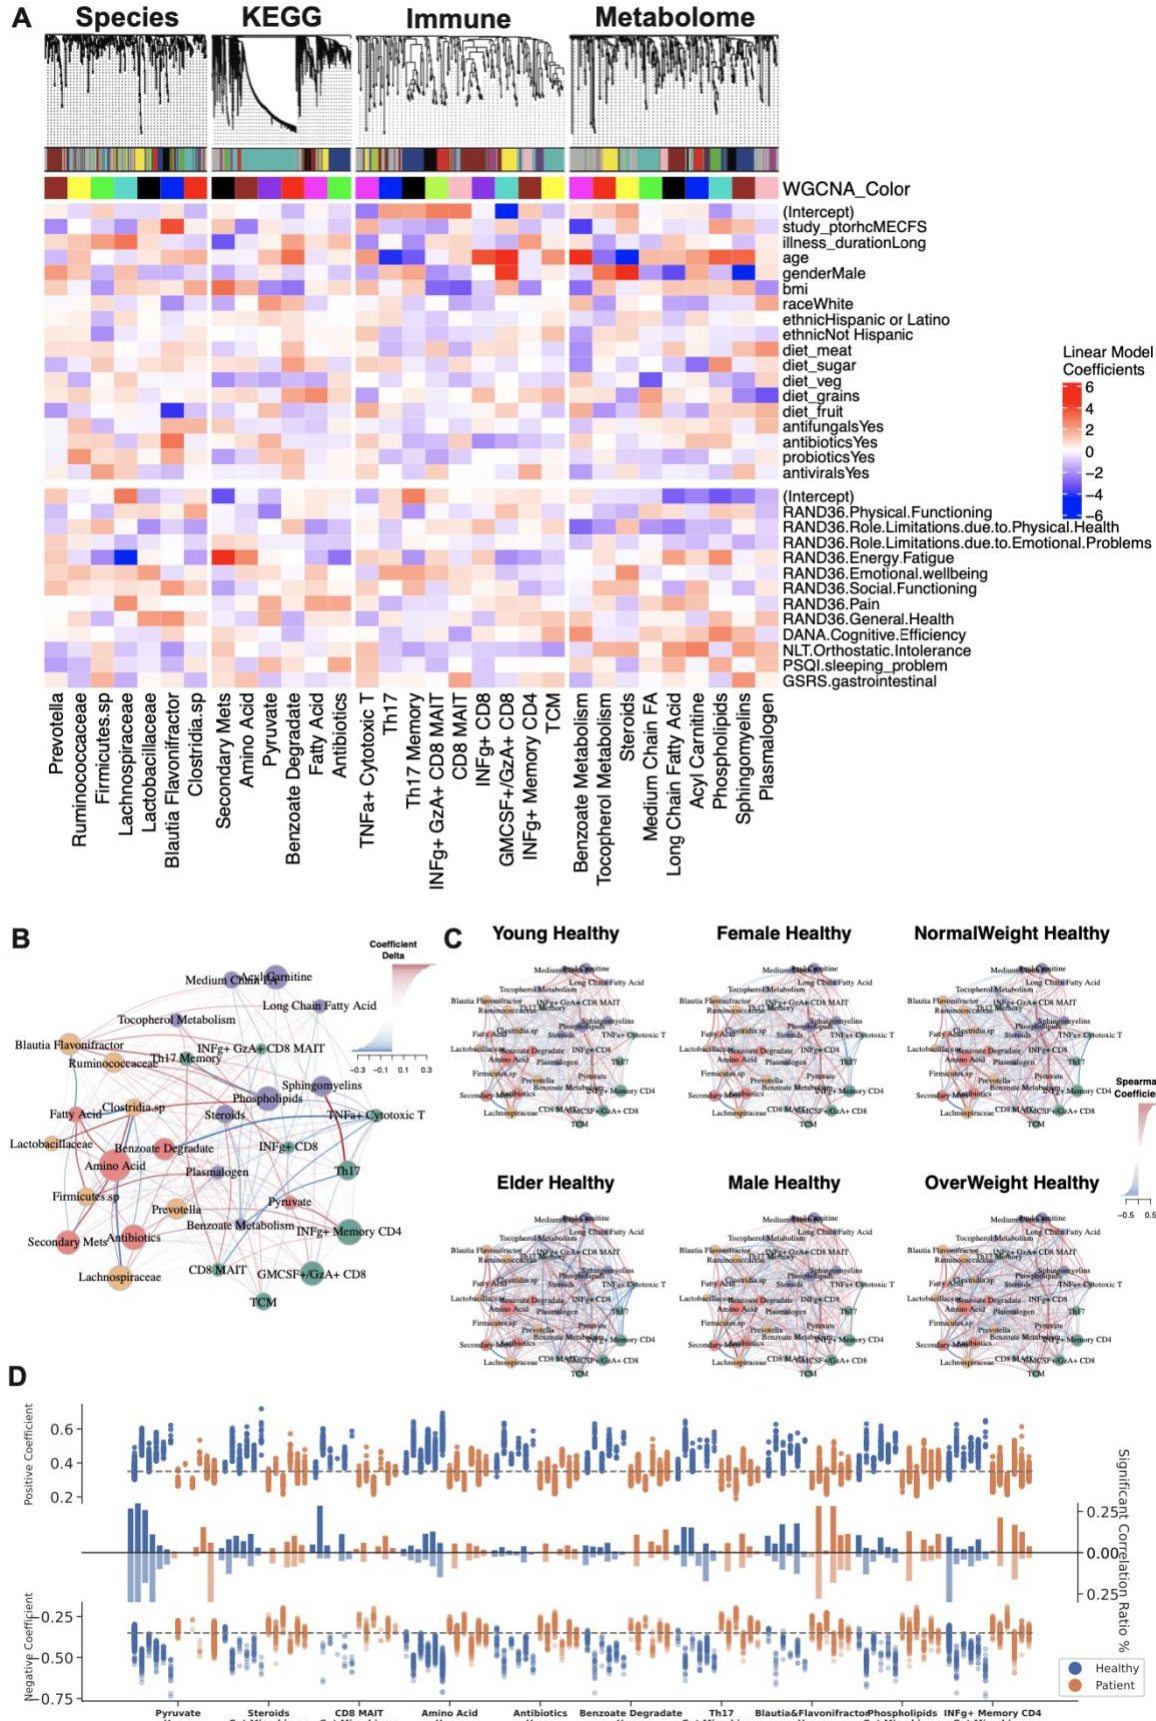

1185 **Supplemental Figure 6: 'Omics WGCNA Modules and Host-Microbiome Network. A)**  
1186 **Correlation of WGCNA Modules with Clinical Metadata.** Weighted Gene Co-expression  
1187 Network Analysis (WGCNA) was used to identify co-expression modules for each 'omics layer:  
1188 species, KEGG, immune, and metabolome. The top dendrograms show hierarchical clustering of  
1189 'omics features, with modules identified. The bottom heatmap shows the relationship of  
1190 module eigengenes (colored as per dendrogram) with clinical metadata – including  
1191 demographic information and environmental factors - and 12 clinical scores. General linear  
1192 models were used to determine the primary clinical drivers for each module, with the color  
1193 gradient representing the coefficients (red = positive, blue = negative). Microbial modules were  
1194 influenced by disease presence and energy-fatigue levels, while metabolome and immune  
1195 modules correlated with age and gender. **B-C) Microbiome-Immune-Metabolome Network in**  
1196 **B) Patient and C) Healthy Subgroups.** Supplemental information for Figure 4A (Healthy  
1197 Network) and 4B (Patient Subgroups). Figure 4A is the healthy network; here, Supplemental  
1198 Figure 6B presented the shifted correlations in all patients. Figure 4B represented the network  
1199 in patient subgroups; here, Supplemental Figure 6C is the corresponding healthy counterpart,  
1200 for example, female patients were compared with female controls to exclude gender influences.  
1201 **D) Differences in Host-Microbiome Correlations between Healthy and Patient Subgroups.**  
1202 Selected host-microbiome module pairs are grouped on the x-axis (e.g., pyruvate to blood  
1203 modules, steroids to gut microbiome). Significant positive and negative correlations (top and  
1204 bottom y-axis) of module members pairs are shown as dots for each subgroup (blue = healthy,  
1205 orange = patient) (Spearman, adjusted  $p < 0.05$ ), from left to right: Young, Elder, Female, Male,  
1206 NormalWeight, OverWeight Healthy and Young, Elder, Female, Male, NormalWeight,  
1207 OverWeight Patient. The middle bars represent the total count of associations. This panel  
1208 highlights the shifts in host-microbiome networks from health to disease, for example, in  
1209 patients, the loss of pyruvate to host blood modules correlation and the increase of INFg+ CD4  
1210 memory correlation with gut microbiome. **Abbreviations:** WGCNA, Weighted Gene Co-  
1211 expression Network Analysis; AA, Amino Acids; SCFA, Short-Chain Fatty Acids; IL, Interleukin;  
1212 GM-CSF, Granulocyte-Macrophage Colony-Stimulating Factor. **Related to:** Figure 4.
