# Supplementary figures and images for: BioMapAI: Artificial Intelligence Multi-Omics Modeling of Myalgic Encephalomyelitis / Chronic Fatigue Syndrome
Source: PubMed Central journal article supplement — bioRxiv. 2025 Feb 13:2024.06.24.600378. Originally published 2024 Jun 28. Preprint. [Version 2] doi: 10.1101/2024.06.24.600378 (PMC11230215; doi:10.1101/2024.06.24.600378), 2025-02-13

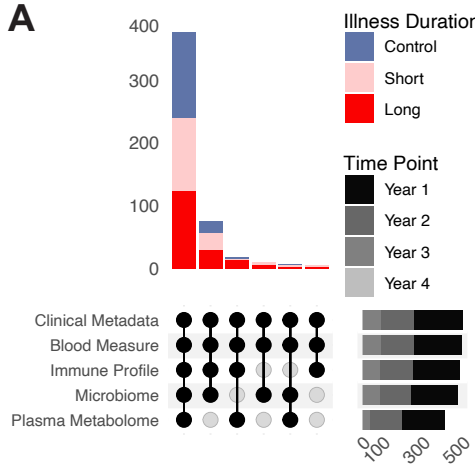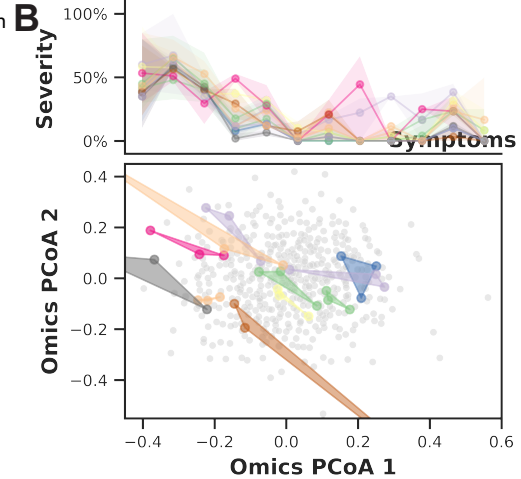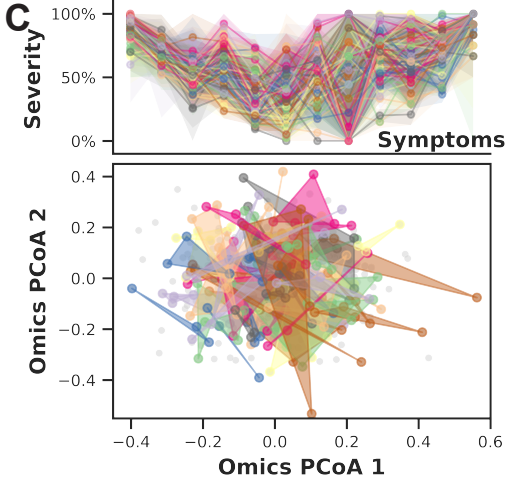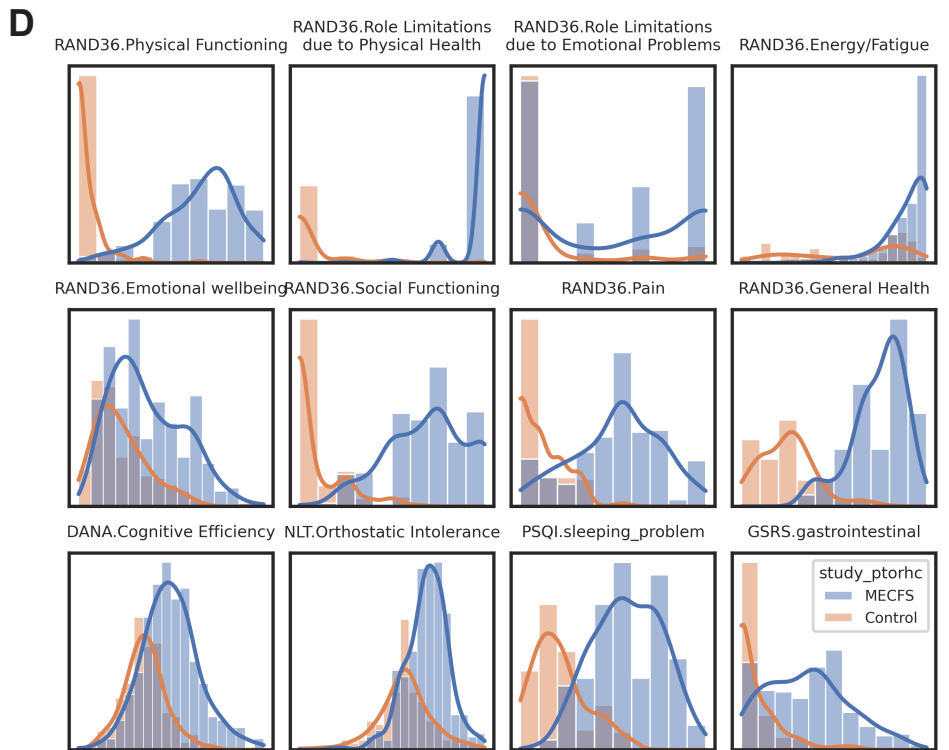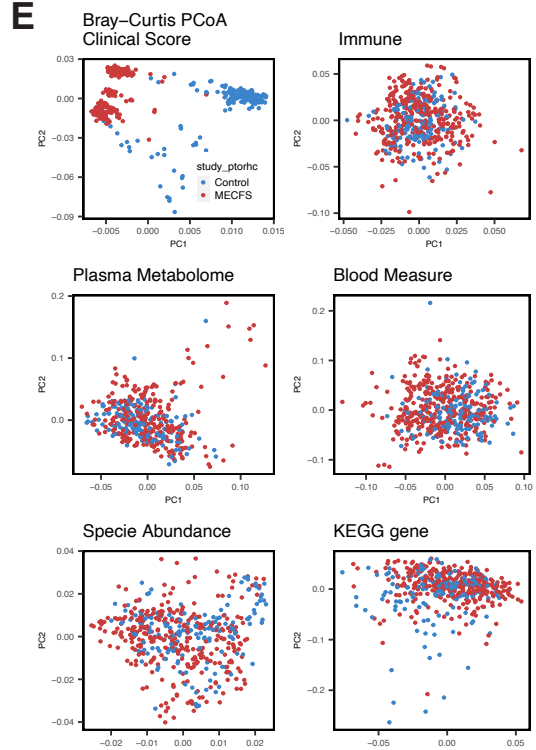

Supplement: media-1.pdf [file media-1.pdf]

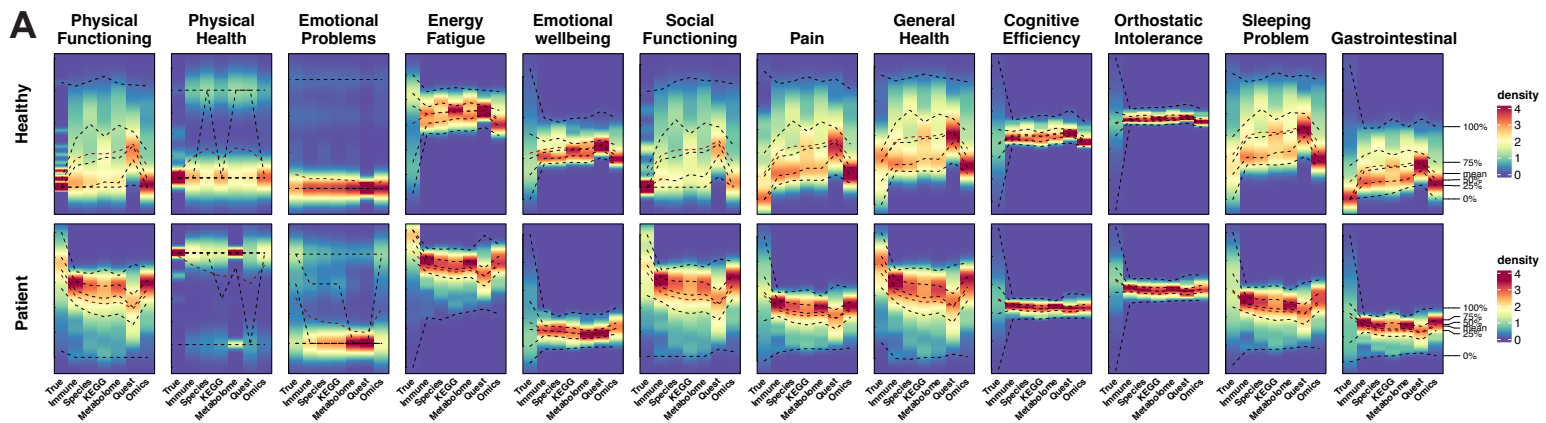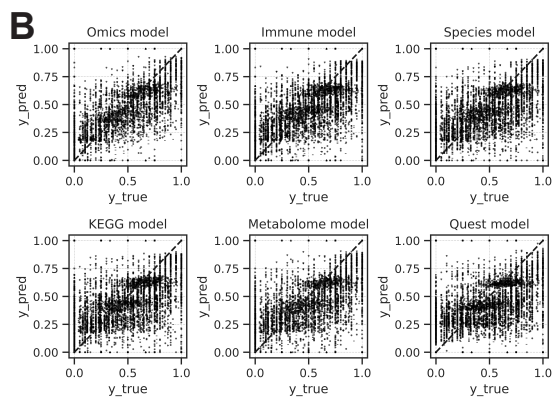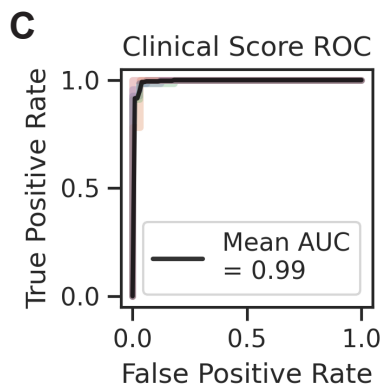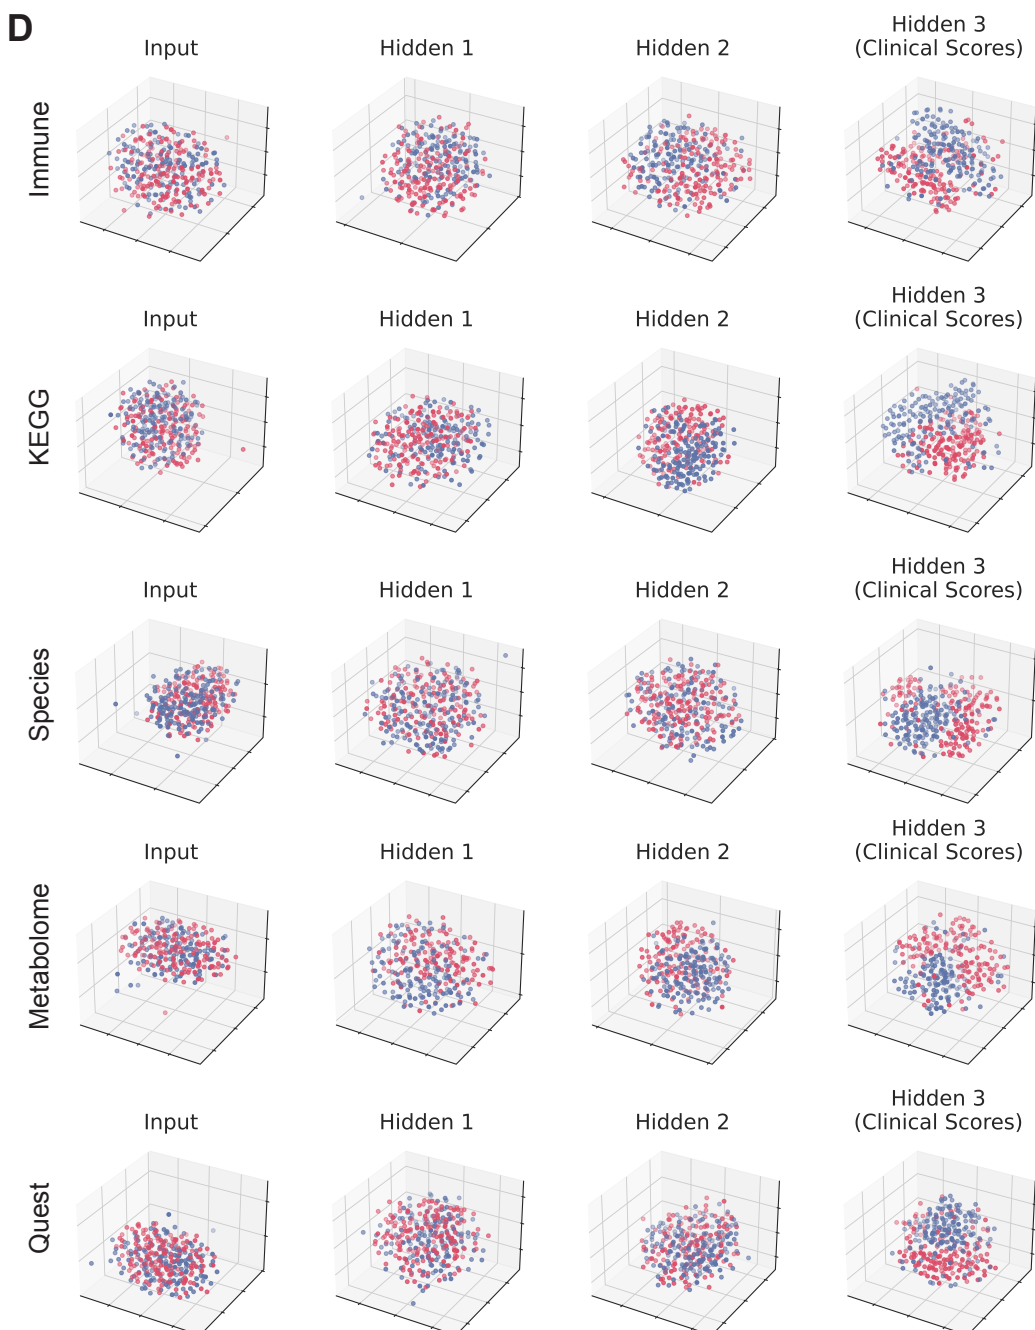

Supplement: media-2.pdf [file media-2.pdf]

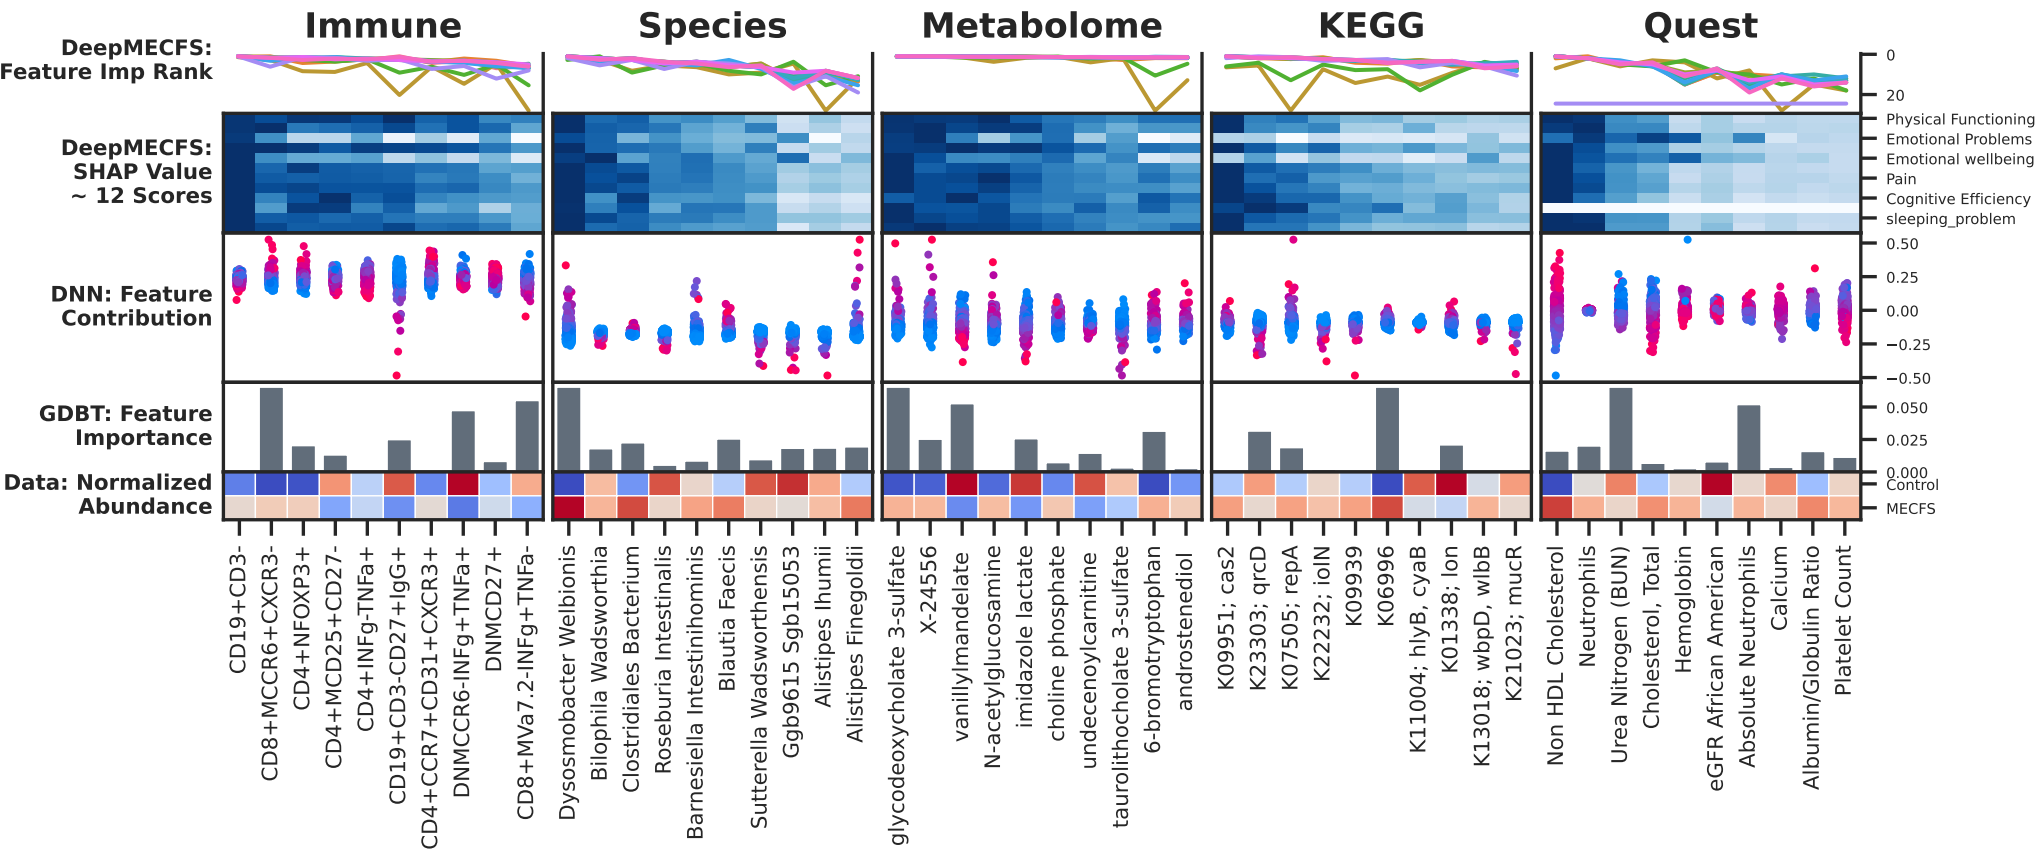

Supplement: media-3.pdf [file media-3.pdf]

**A**

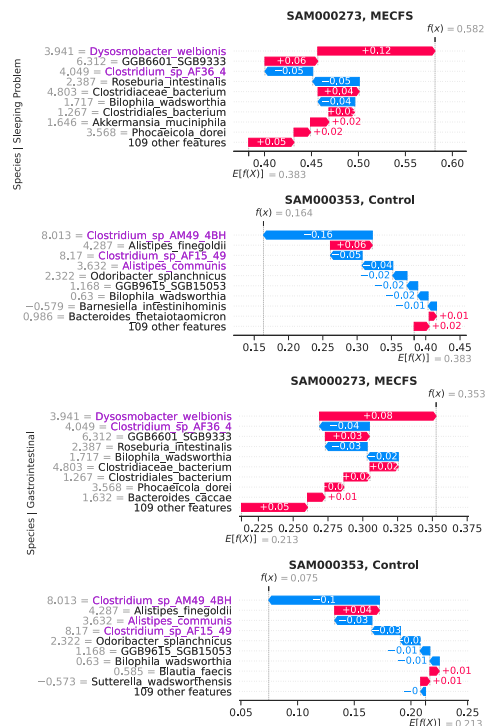

**B**

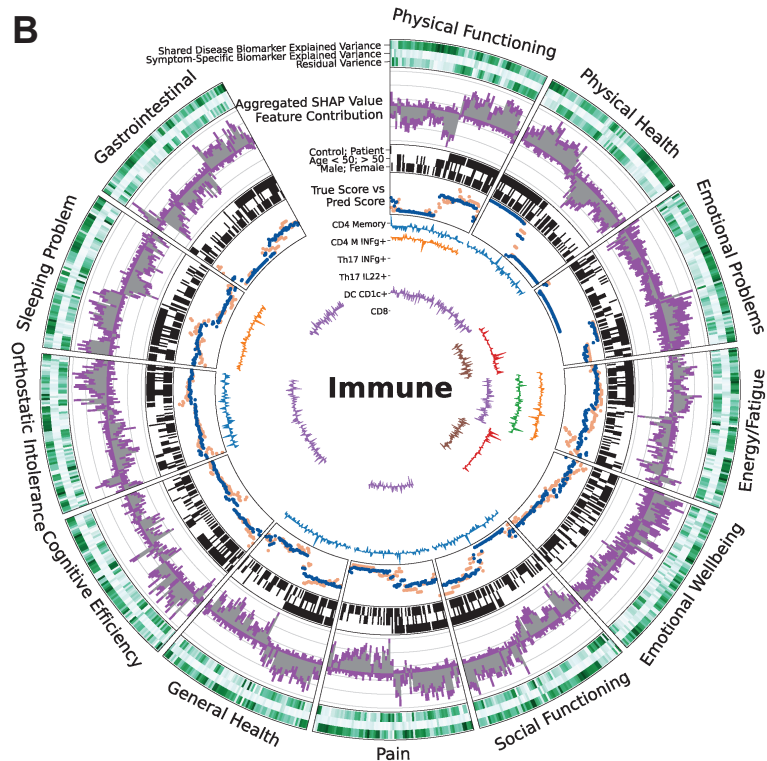

**C**

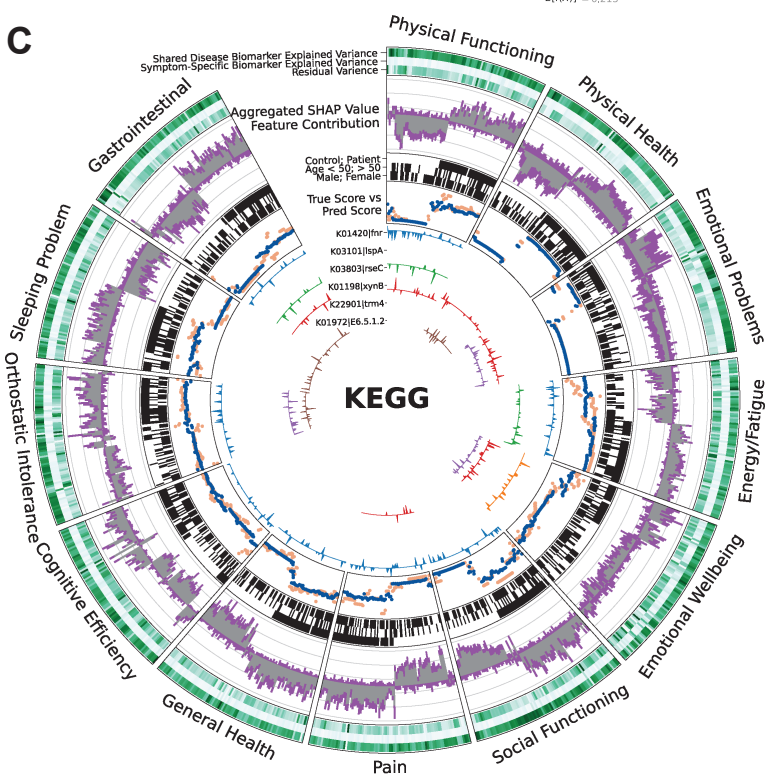

**D**

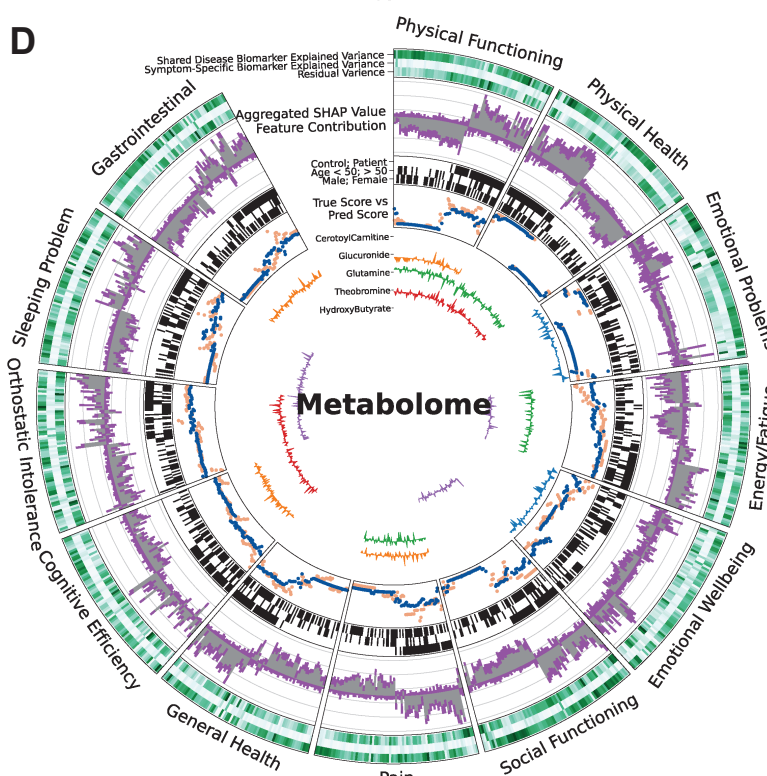

**E**

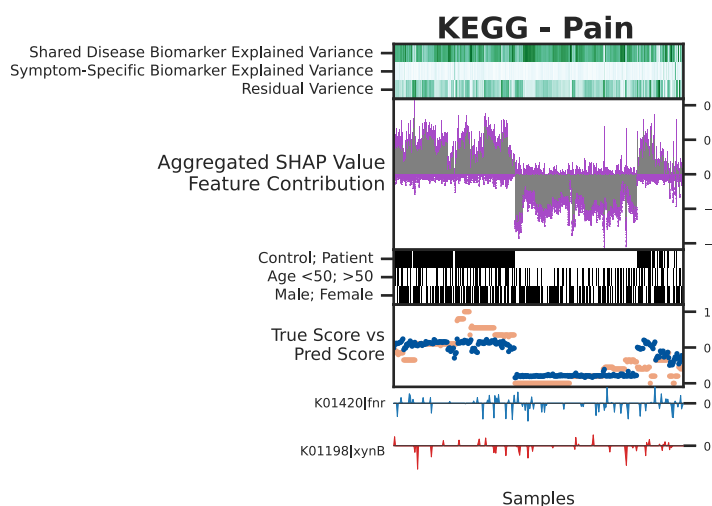

**F**

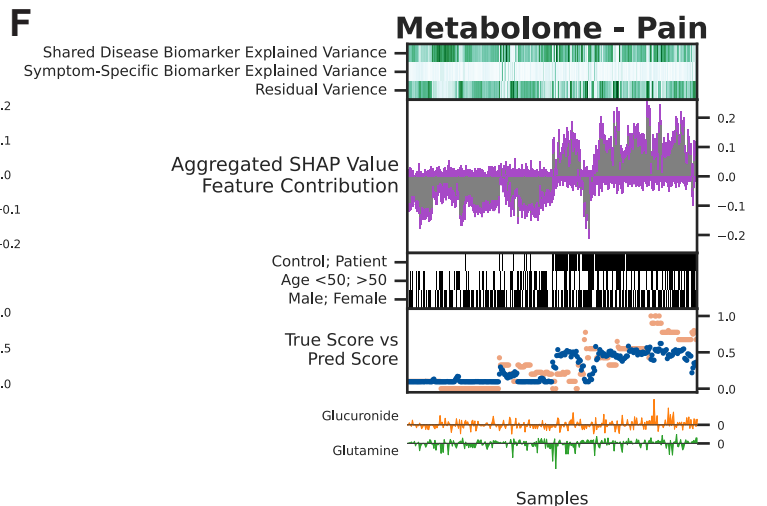

Supplement: media-4.pdf [file media-4.pdf]

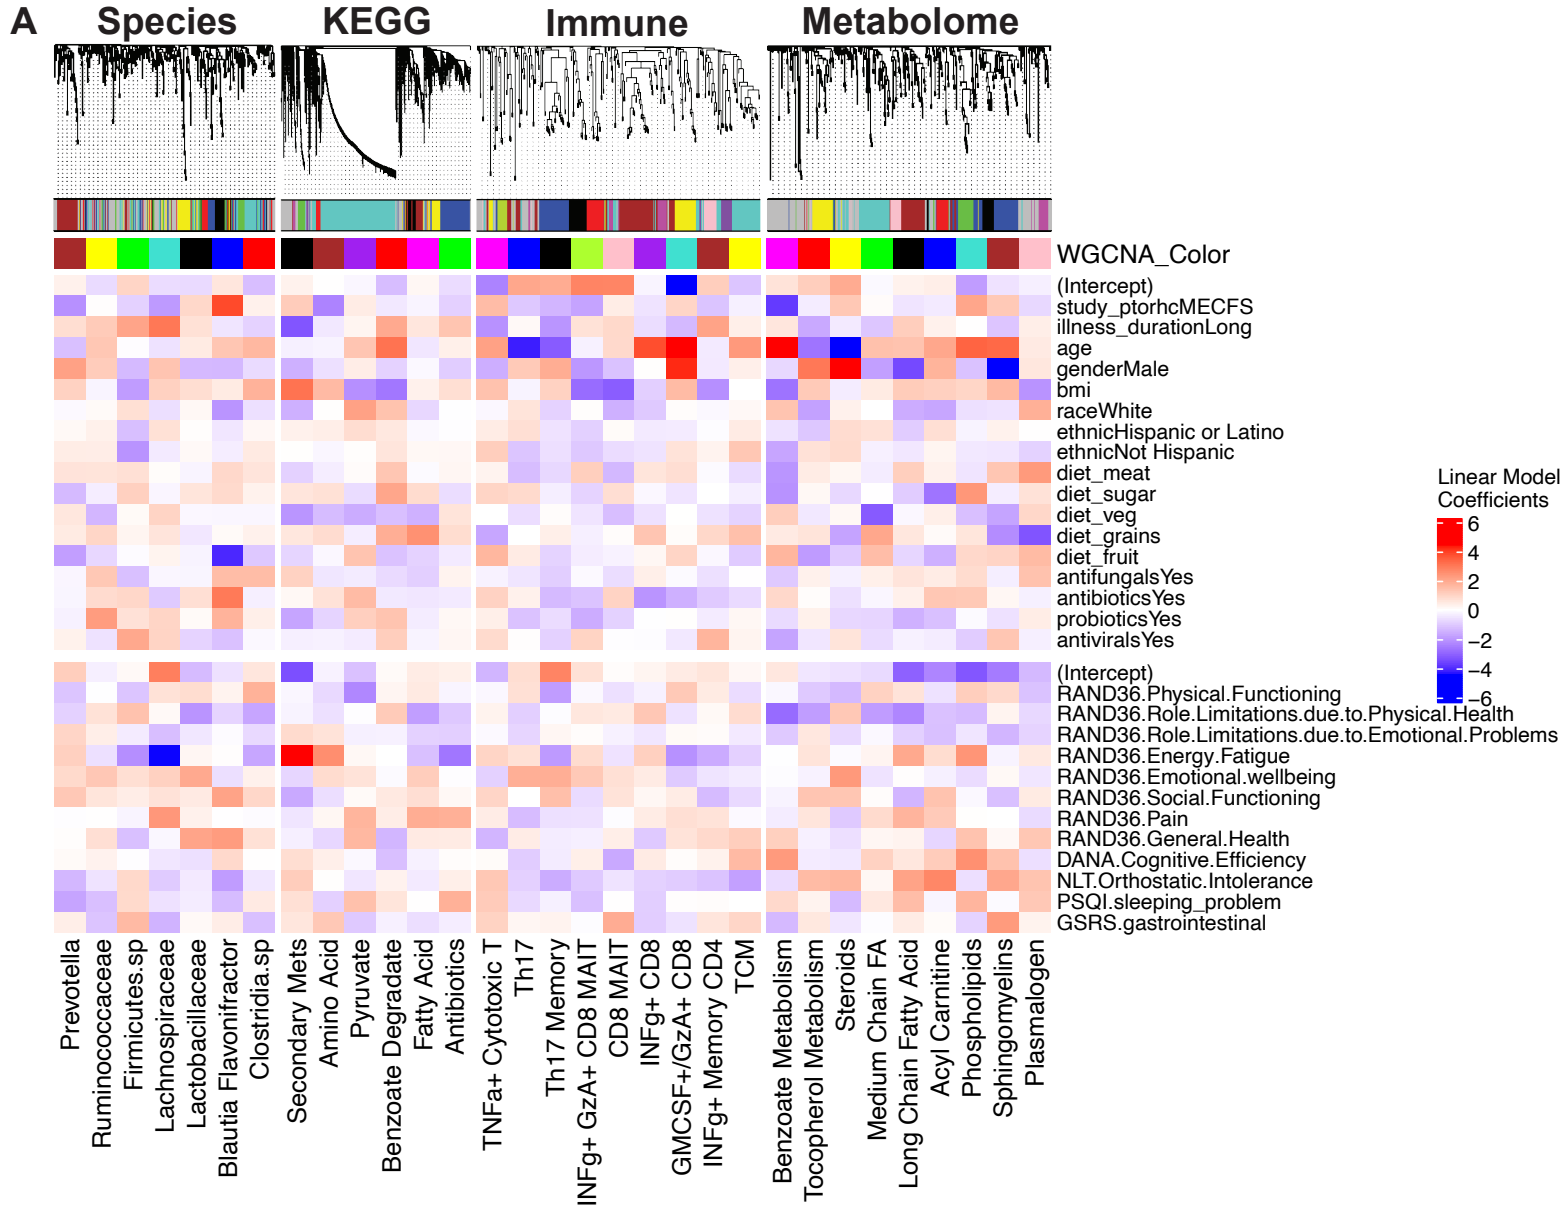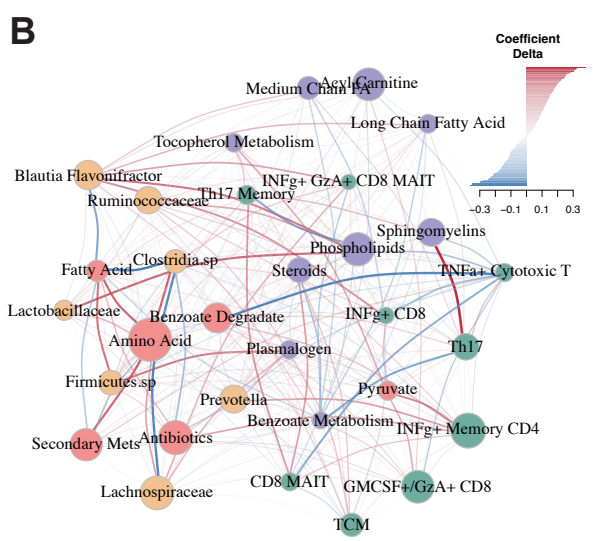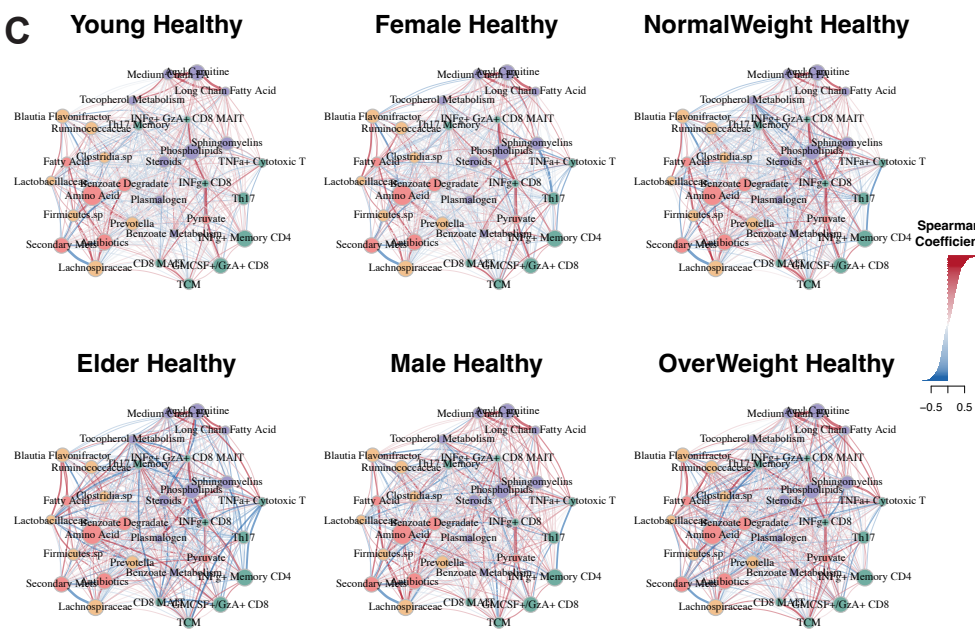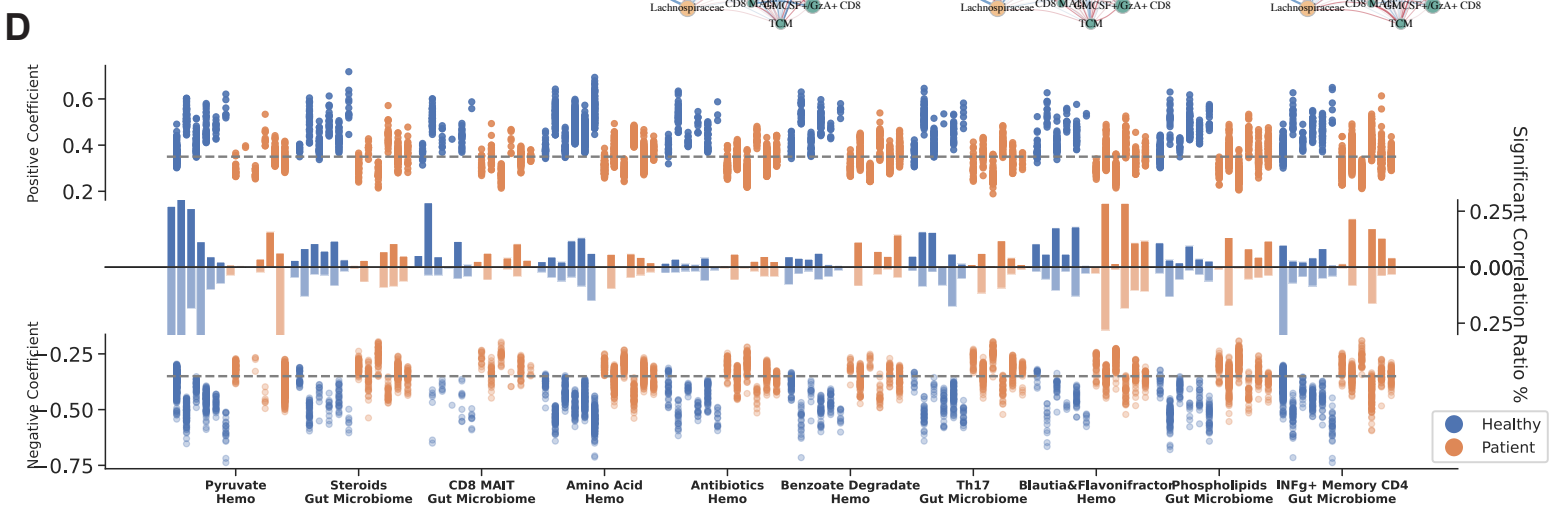

Supplement: media-6.pdf [file media-6.pdf]
